# Supplementary material for: Rigidity Strengthening of Landslide Materials Measured by Seismic Interferometry
Source: MDPI journal article supplement (doi:10.3390/rs13142834), 2021-07-19
Supplement: s1 [file s1]

# Supplementary Material: Strengthening the Rigidity of Landslide Materials Measured by Seismic Interferometry

Keng-Hao Kang <sup>1,2,3</sup>, Wei-An Chao <sup>1,2,4,\*</sup>, Che-Ming Yang <sup>5</sup>, Ming-Chien Chung <sup>6</sup>, Yu-Ting Kuo <sup>7</sup>, Chih-Hsiang Yeh <sup>8</sup>, Hsin-Chang Liu <sup>4</sup>, Chun-Hung Lin <sup>9</sup>, Chih-Pin Lin <sup>1,2,4</sup>, Jyh-Jong Liao <sup>1,2,4</sup>, Jui-Ming Chang <sup>10</sup>, Yin Jeh Ngui <sup>2</sup>, Chien-Hsin Chen <sup>6</sup> and Tung-Lin Tai <sup>11</sup>

- <sup>1</sup> Department of Civil Engineering, National Chiao Tung University, Hsinchu 30010, Taiwan; kangkanghk.c@nctu.edu.tw (K.-H.K.); cplin@mail.nctu.edu.tw (C.-P.L.); jjliao@mail.nctu.edu.tw (J.-J.L.)
  - <sup>2</sup> Department of Civil Engineering, National Yang Ming Chiao Tung University, Hsinchu 30010, Taiwan; ngui@nctu.edu.tw
  - <sup>3</sup> He Yu Engineering Consultants Co., Ltd., Taichung, Taiwan
  - <sup>4</sup> Disaster Prevention and Water Environment Research Center, National Chiao Tung University, Hsinchu 30010, Taiwan; lhchang@g2.nctu.edu.tw
  - <sup>5</sup> Department of Civil and Disaster Prevention Engineering, National United University, Miao-Li 36003, Taiwan; stanleyyangcm@nuu.edu.tw
  - <sup>6</sup> Geotechnical Engineering Research Center, Sinotech Engineering Consultants, Taipei 11494, Taiwan; mcchung@sinotech.org.tw (M.-C.C.); chchen@sinotech.org.tw (C.-H.C.)
  - <sup>7</sup> Department of the Earth and Environmental Sciences, National Chung-Cheng University, Chia-yi County 621, Taiwan; yutingkuo@ccu.edu.tw
  - <sup>8</sup> Department of Civil Engineering, National Central University, Taoyuan 320, Taiwan; chihhsiang@ncu.edu.tw
  - <sup>9</sup> Department of Marine Environment and Engineering, National Sun Yat-sen University, Kaoshiung, Taiwan; chlin.geo@mail.nsysu.edu.tw
  - <sup>10</sup> Department of Geosciences, National Taiwan University, Taipei 10617, Taiwan; d04224006@ntu.edu.tw
  - <sup>11</sup> Central Geological Survey, MOEA, Taipei 23568, Taiwan; tunglin@moeacgs.gov.tw
- \* Correspondence: vvnchao@nctu.edu.tw

Here we provide Supplementary Information about:

**Table S1.** Description of Drill Cores

**Table S2.** Hydrogeological parameters used in GeoStudio model for the Chashan site

**Table S3.** Parameters used in RAMMS model for the Chashan site

**Table S4.** Safety factor of each analysis scenario

**Figure S1.** Aerial photography

**Figure S2.** Measurement data (A-Axis) of BH1 inclinometer

**Figure S3.** Hydrogeological conceptual model of the Chashan site

**Figure S4.** Filtered (2-10 Hz) daily vertical-component noise cross-correlation functions (NCFs).

**Figure S5.** Inferred potential sliding mass

**Figure S6.** Distribution of earthquakes from the CWB catalog

**Figure S7.** Time series of normalized cross-correlation coefficient (NCC) and precipitation.

**Supplementary References**

**Table S1.** Description of Drill Cores.

| unit     | lithology                                                                                                                          |
|----------|------------------------------------------------------------------------------------------------------------------------------------|
| coluvium | shallow landslide deposit and weathered material                                                                                   |
| SS/SH    | mainly composed of interlays of sandstone and shale                                                                                |
| SS2      | massive sandstone                                                                                                                  |
| SH       | shale lined with thin sandstone                                                                                                    |
| SS-SH    | sandstone lined with shale, a transition unit form unit SH to unit SS1, displays a gradual and progressive change from top to base |
| SS1      | gray sandstone                                                                                                                     |
| DRM2     | sandstone lined with shale(SS-SH), mainly shale, upper part of unit SS-SH                                                          |
| DRM1     | sandstone lined with shale(SS-SH), mainly sandstone, lower part of unit SS-SH                                                      |

**Table S2.** Hydrogeological conceptual model of the Chashan site.

| Parameters                      | Hydrogeologic Unit   |                      |                      |                      |                      |                      |                      | Data Sources                                   |
|---------------------------------|----------------------|----------------------|----------------------|----------------------|----------------------|----------------------|----------------------|------------------------------------------------|
|                                 | Coluvium             | DRM                  | SS/SH                | SS2                  | SH                   | SS-SH                | SS1                  |                                                |
| Unit weigh (kN/m <sup>3</sup> ) | 19.6                 | 19.6                 | 24.5                 | 24.5                 | 24.5                 | 24.5                 | 24.5                 | Soil classification test                       |
| Cohesion (kPa)                  | 25                   | 25                   | 1700                 | 4171                 | 903                  | 835                  | 4171                 | Direct shear test, Unconfined compression test |
| Friction angle (deg.)           | 34.0                 | 34.0                 | 30.0                 | 38.1                 | 23.5                 | 41.0                 | 38.1                 | Direct shear test, Unconfined compression test |
| Hydraulic conductivity (m/s)    | $5.8 \times 10^{-5}$ | $5.8 \times 10^{-5}$ | $2.5 \times 10^{-7}$ | $5.0 \times 10^{-7}$ | $2.5 \times 10^{-7}$ | $2.5 \times 10^{-7}$ | $5.0 \times 10^{-7}$ | Back analysis (compare with monitoring data)   |

**Table S3.** Parameters used in RAMMS model for the Chashan site.

| Parameters                                                  | Laboratory Test | Numerical Simulation          |
|-------------------------------------------------------------|-----------------|-------------------------------|
| Unit weight ( $\rho$ , kN/m <sup>3</sup> )                  | 19.6            | 19.6                          |
| Friction angle ( $\varphi$ , deg.)                          | 34.0            | 34.0                          |
| Friction coefficient ( $\mu$ )                              | 0.675           | 0.675                         |
| Turbulent friction coefficient ( $\xi$ , m/s <sup>2</sup> ) | -               | 300 <sup>1</sup>              |
| Simulation stop criteria                                    |                 | $M_{\max} < 5\%$ <sup>2</sup> |

Note: <sup>1</sup> Suggestion value by RAMMS manual (SLF/WSL, 2013) (Volume > 60,000 m<sup>3</sup>; elevation < 1000 m).

<sup>2</sup>  $M_{\max}$ : Maximum momentum.

**Table S4.** Safety factor of each analysis scenario.

| Scenario                   | Potential Sliding Mass |      |      |              |
|----------------------------|------------------------|------|------|--------------|
|                            | B1                     | B2   | B3   | Auto located |
| Normal condition           | 2.67                   | 2.31 | 1.57 | 2.21         |
| 0602 torrential rain event | 2.19                   | 1.66 | 1.04 | 1.79         |
| 0823 torrential rain event | 2.33                   | 1.77 | 1.13 | 1.94         |
| Earthquake condition       | 1.81                   | 1.60 | 1.20 | 1.53         |

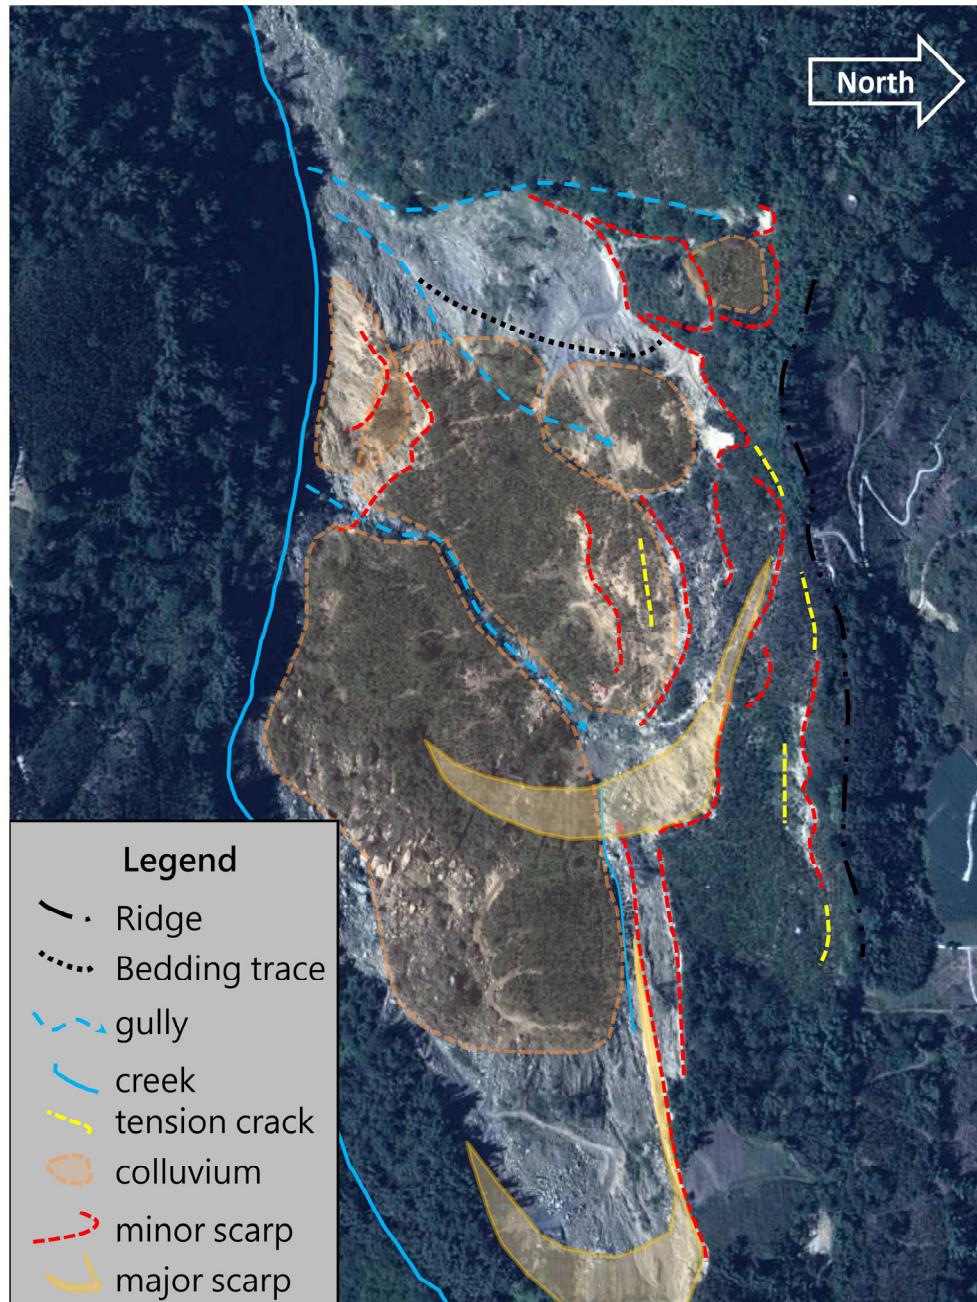

Figure S1. Aerial photography.

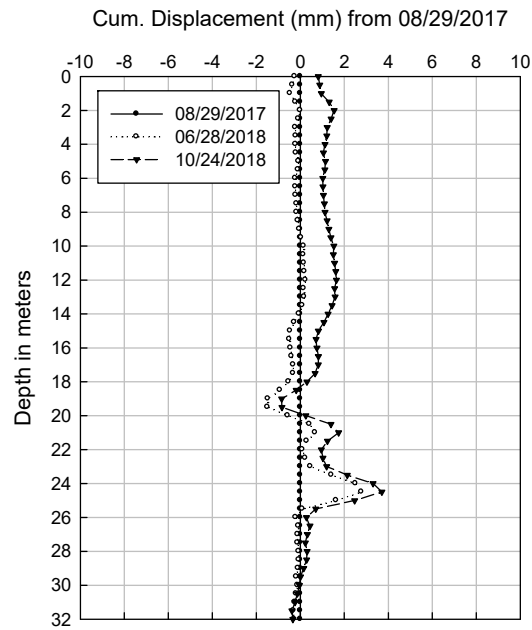

Figure S2. Measurement data (A-Axis) of BH1 inclinometer.

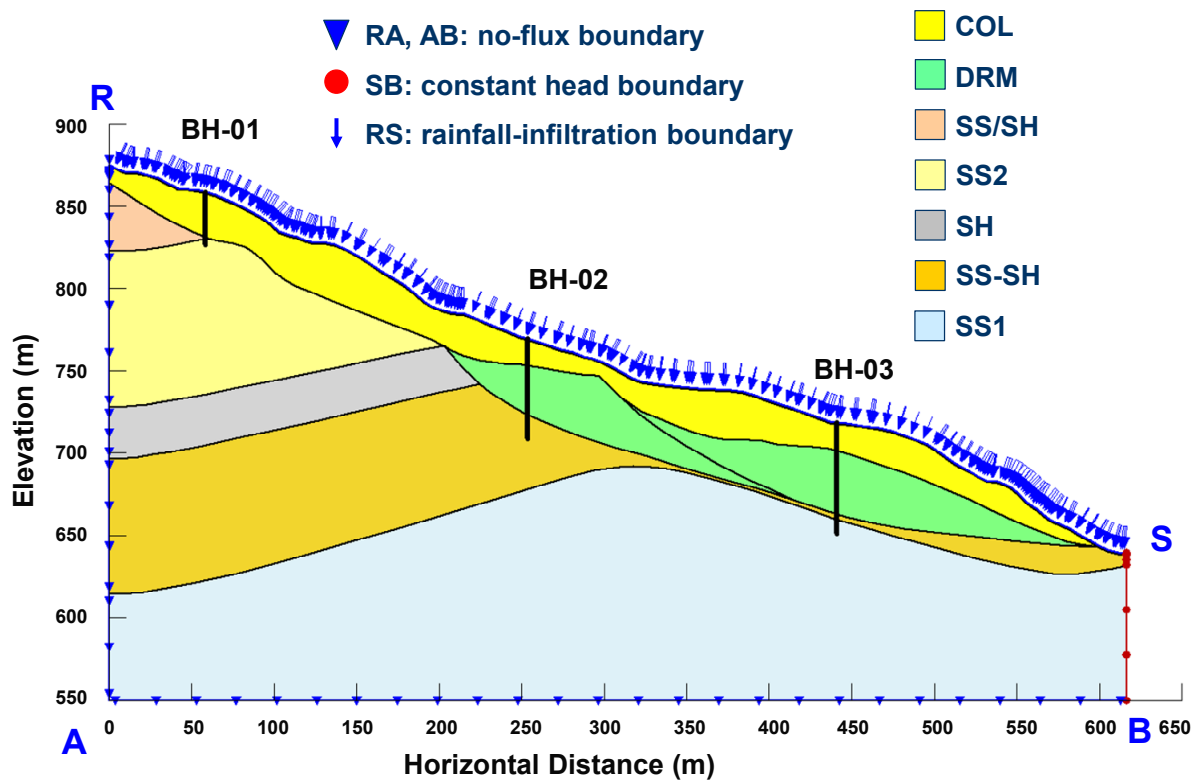

Figure S3. Hydrogeological conceptual model of the Chashan site.



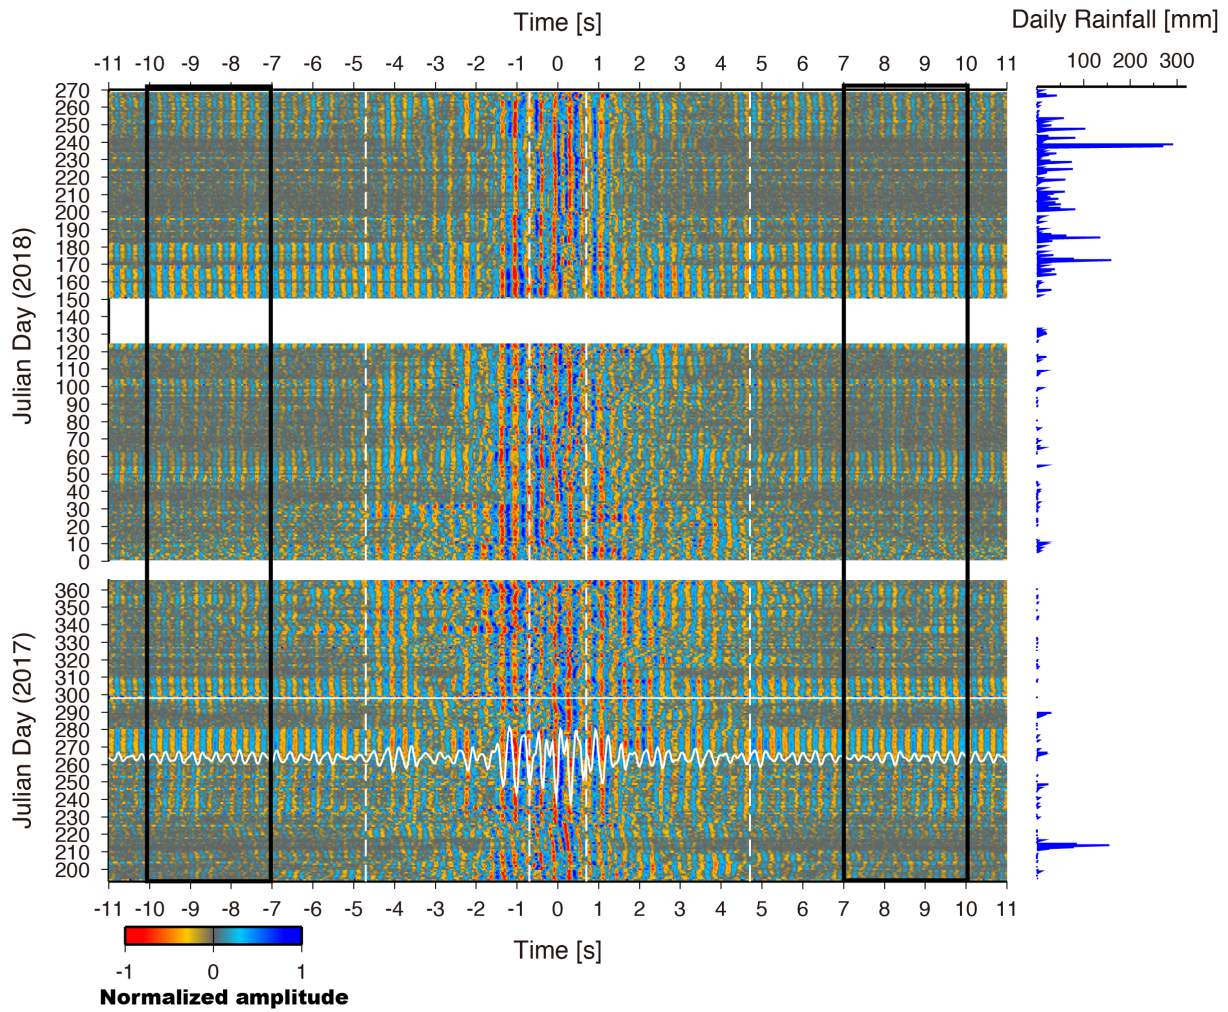

**Figure S4.** Filtered (2–10 Hz) daily vertical-component noise cross-correlation functions (NCFs). Amplitude of NCF is normalized each day. The reference NCF (RNCF) linearly stacked from all daily NCF. Black rectangle in NCF and RNCF waveforms indicates the portions of the coda wave used in  $dv/v$  measurement. Time series of daily precipitation is shown in the right panel.

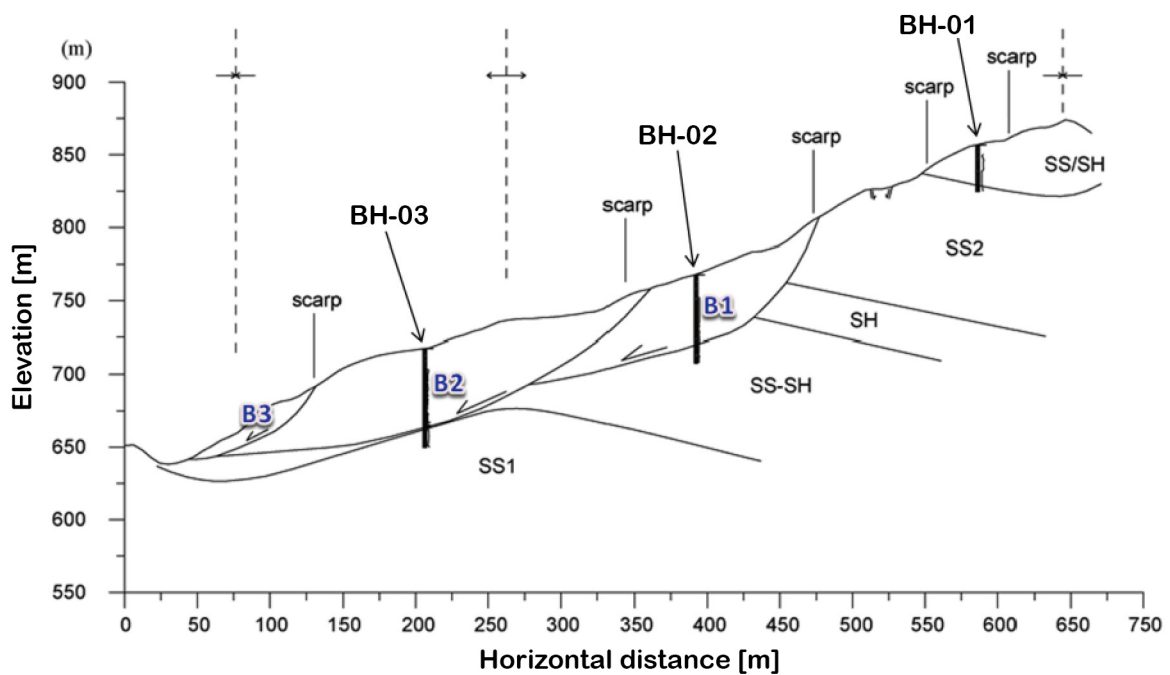

**Figure S5.** Inferred potential sliding mass.

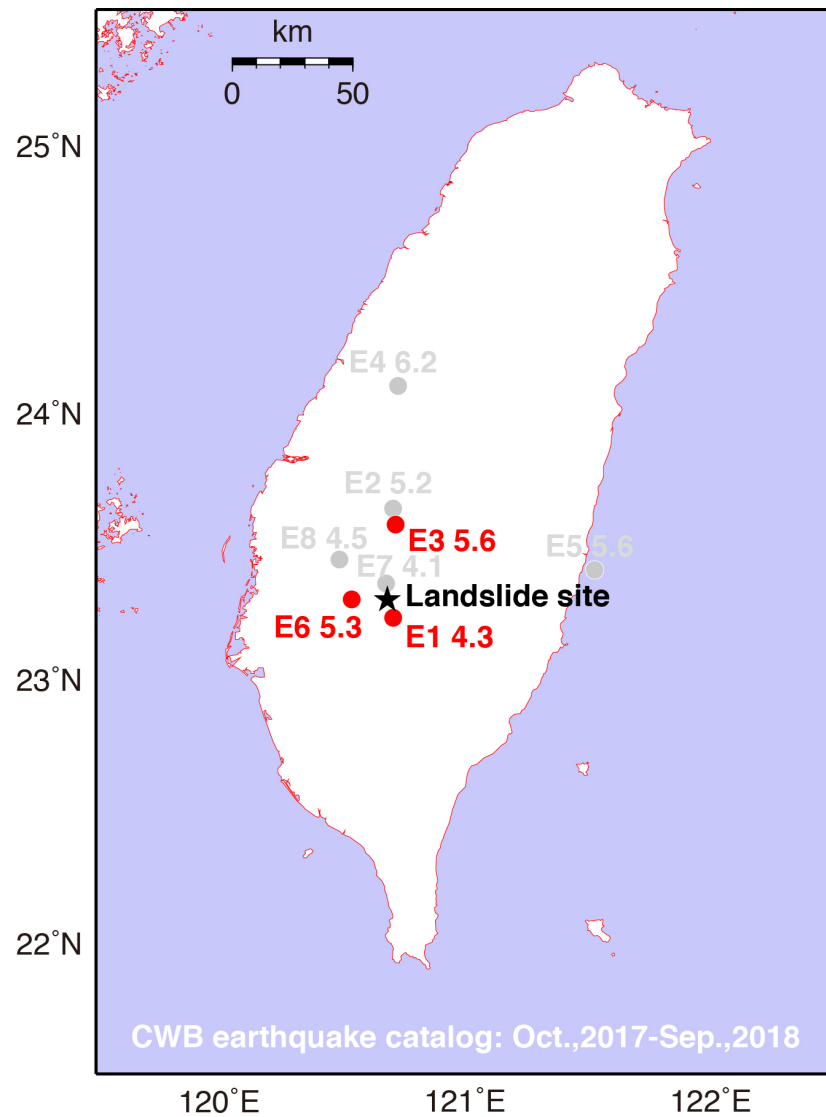

**Figure S6.** Distribution of earthquakes from the CWB catalog. The gray and red dots indicate the earthquake events excited the ground shaking intensities of III and IV at landslide area, respectively. Star is study area. The numbers shown beside the dots are event number and local magnitude ( $M_L$ ).

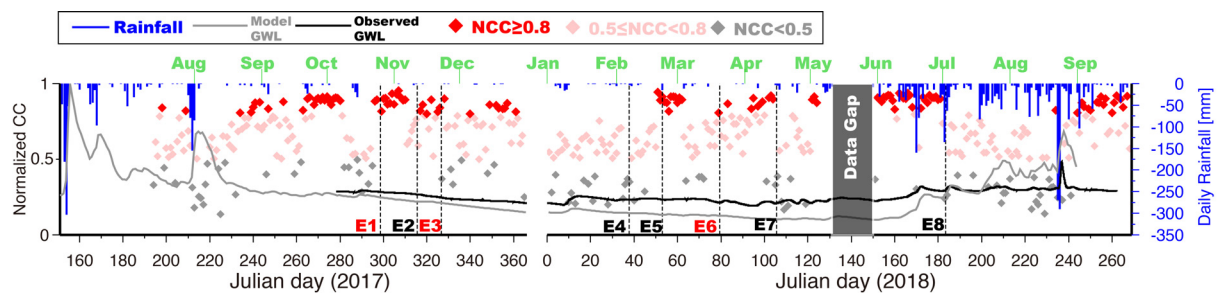

**Figure S7.** Time series of the normalized cross-correlation coefficient (NCC) and precipitations. Diamonds with different colors indicate different ranges of NCC values (red:  $NCC \geq 0.8$ ; light red:  $0.5 \leq NCC < 0.8$ ; gray:  $NCC < 0.5$ ). The black and red labels indicate the earthquake events excited the ground shaking intensities of III and IV at landslide area, respectively. The gray shaded area indicates the seismic data gap.

#### Supplementary References:

SLF/WSL (2013), *RAMMS: User Manual v1.5. Avalanche, a Numerical Model for Snow Avalanches in Research and Practice*; SLF/WSL: Davos, Switzerland, 97p.
